# Supplementary material for: Meta-analysis of studies using statins as a reducer for primary liver cancer risk
Source: PubMed Central journal article supplement (PMC4873806; doi:10.1038/srep26256), 2016-05-20
Supplement: srep26256-s1.pdf [file srep26256-s1.pdf]

---

## **Meta-analysis of studies using statins as a reducer for primary liver cancer risk**

Guo-Chao Zhong, Yan Liu, Yuan-Yuan Ye, Fa-Bao Hao, Kang Wang & Jian-Ping Gong

### **Supplementary List 1 Search Strategy**

#### **PubMed**

**#1** (((cancer\*[Title/Abstract]) OR neoplasm\*[Title/Abstract]) OR carcinoma\*[Title/Abstract]) OR malignanc\*[Title/Abstract]

**#2** ((liver[Title/Abstract]) OR hepatic[Title/Abstract]) OR hepatocellular[Title/Abstract]

**#3** #1 AND #2

**#4** ((hepatocarcinoma[Title/Abstract]) OR "liver cell carcinoma\*" [Title/Abstract]) OR hepatoma[Title/Abstract]

**#5** #3 OR #4

**#6** (((((((((((statin\*[Title/Abstract]) OR "HMG-CoA reductase inhibitor\*" [Title/Abstract]) OR "Hydroxymethylglutaryl-CoA reductase inhibitor\*" [Title/Abstract]) OR atorvastatin[Title/Abstract]) OR cerivastatin[Title/Abstract]) OR fluvastatin[Title/Abstract]) OR lovastatin[Title/Abstract]) OR pravastatin[Title/Abstract]) OR rosuvastatin[Title/Abstract]) OR simvastatin[Title/Abstract]) OR

---

pitavastatin[Title/Abstract]

**#7 #5 AND #6**

**EMBASE**

**#1** statin\* AND ([article]/lim OR [article in press]/lim OR [conference abstract]/lim OR [conference paper]/lim) AND ([chinese]/lim OR [english]/lim) AND [embase]/lim

**#2** 'hmg coa' AND reductase AND inhibitor\* AND ([article]/lim OR [article in press]/lim OR [conference abstract]/lim OR [conference paper]/lim) AND ([chinese]/lim OR [english]/lim) AND [embase]/lim

**#3** 'hydroxymethylglutaryl coa' AND reductase AND inhibitor\* AND ([article]/lim OR [article in press]/lim OR [conference abstract]/lim OR [conference paper]/lim) AND ([chinese]/lim OR [english]/lim) AND [embase]/lim

**#4** atorvastatin AND ([article]/lim OR [article in press]/lim OR [conference abstract]/lim OR [conference paper]/lim) AND ([chinese]/lim OR [english]/lim) AND [embase]/lim

**#5** cerivastatin AND ([article]/lim OR [article in press]/lim OR [conference abstract]/lim OR [conference paper]/lim) AND ([chinese]/lim OR [english]/lim) AND [embase]/lim

---

**#6** fluvastatin AND ([article]/lim OR [article in press]/lim OR [conference abstract]/lim OR [conference paper]/lim) AND ([chinese]/lim OR [english]/lim) AND [embase]/lim

**#7** lovastatin AND ([article]/lim OR [article in press]/lim OR [conference abstract]/lim OR [conference paper]/lim) AND ([chinese]/lim OR [english]/lim) AND [embase]/lim

**#8** pravastatin AND ([article]/lim OR [article in press]/lim OR [conference abstract]/lim OR [conference paper]/lim) AND ([chinese]/lim OR [english]/lim) AND [embase]/lim

**#9** rosuvastatin AND ([article]/lim OR [article in press]/lim OR [conference abstract]/lim OR [conference paper]/lim) AND ([chinese]/lim OR [english]/lim) AND [embase]/lim

**#10** simvastatin AND ([article]/lim OR [article in press]/lim OR [conference abstract]/lim OR [conference paper]/lim) AND ([chinese]/lim OR [english]/lim) AND [embase]/lim

**#11** pitavastatin AND ([article]/lim OR [article in press]/lim OR [conference abstract]/lim OR [conference paper]/lim) AND ([chinese]/lim OR [english]/lim) AND [embase]/lim

**#12** #1 OR #2 OR #3 OR #4 OR #5 OR #6 OR #7 OR #8 OR #9 OR #10 OR #11

---

**#13** cancer\* AND ([article]/lim OR [article in press]/lim OR [conference abstract]/lim OR [conference paper]/lim) AND ([chinese]/lim OR [english]/lim) AND [embase]/lim

**#14** neoplasm\* AND ([article]/lim OR [article in press]/lim OR [conference abstract]/lim OR [conference paper]/lim) AND ([chinese]/lim OR [english]/lim) AND [embase]/lim

**#15** carcinoma\* AND ([article]/lim OR [article in press]/lim OR [conference abstract]/lim OR [conference paper]/lim) AND ([chinese]/lim OR [english]/lim) AND [embase]/lim

**#16** malignanc\* AND ([article]/lim OR [article in press]/lim OR [conference abstract]/lim OR [conference paper]/lim) AND ([chinese]/lim OR [english]/lim) AND [embase]/lim

**#17** #13 OR #14 OR #15 OR #16

**#18** liver AND ([article]/lim OR [article in press]/lim OR [conference abstract]/lim OR [conference paper]/lim) AND ([chinese]/lim OR [english]/lim) AND [embase]/lim

**#19** hepatic AND ([article]/lim OR [article in press]/lim OR [conference abstract]/lim OR [conference paper]/lim) AND ([chinese]/lim OR [english]/lim) AND [embase]/lim

---

**#20** hepatocellular AND ([article]/lim OR [article in press]/lim OR [conference abstract]/lim OR [conference paper]/lim) AND  
([chinese]/lim OR [english]/lim) AND [embase]/lim

**#21** #18 OR #19 OR #20

**#22** #17 AND #21

**#23** hepatocarcinoma AND ([article]/lim OR [article in press]/lim OR [conference abstract]/lim OR [conference paper]/lim) AND  
([chinese]/lim OR [english]/lim) AND [embase]/lim

**#24** liver AND cell AND carcinoma\* AND ([article]/lim OR [article in press]/lim OR [conference abstract]/lim OR [conference paper]/lim)  
AND ([chinese]/lim OR [english]/lim) AND [embase]/lim

**#25** hepatoma AND ([article]/lim OR [article in press]/lim OR [conference abstract]/lim OR [conference paper]/lim) AND ([chinese]/lim  
OR [english]/lim) AND [embase]/lim

**#26** #23 OR #24 OR #25

**#27** #22 OR #26

**#28** #12 AND #27

**Supplementary Table S1.** Characteristics of included cohort studies, nested case-control studies, and post hoc analyses of RCTs on statin use and primary liver cancer risk

| Study; location                         | Design              | Age (y) <sup>a</sup> | Sample size                   | Data source      | Study population   | Definition of nonuser                       | Cancer cases | Follow-up <sup>a</sup> (y) | Adjustment factors                                                                                                                                                                                                                                     |
|-----------------------------------------|---------------------|----------------------|-------------------------------|------------------|--------------------|---------------------------------------------|--------------|----------------------------|--------------------------------------------------------------------------------------------------------------------------------------------------------------------------------------------------------------------------------------------------------|
| Simon et al., 2016; USA <sup>16</sup>   | Cohort              | 53.0                 | T: 9135<br>M:8745<br>W:390    | Population-based | Subjects with HCV  | Subjects using statins $\leq 28$ cDDD       | 239          | 7.4                        | Age, sex, alcohol, ACEIs, attainment of sustained virologic response, baseline FIB-4 score, BMI, caffeine intake, daily caffeine intake, diabetes, metformin use, NSAIDs, other lipid-lowering agent use, prior completed HCV treatment, race, smoking |
| Tsan et al., 2015; Taiwan <sup>35</sup> | Cohort              | 35.0 <sup>b</sup>    | T:91265<br>M:66635<br>W:24630 | Population-based | Subjects with HBV  | Subjects using statins $< 28$ cDDD          | 2841         | 2.9                        | Interferon, income, urbanization                                                                                                                                                                                                                       |
| McGlynn et al., 2015; UK <sup>12</sup>  | Nested case-control | 67.0                 | T:5835<br>M:4178<br>W:1657    | Population-based | General population | Subjects with one or no statin prescription | 1195         | $\leq 23.0$                | Alcohol-related disorders, BMI, diabetes, HBV, HCV, smoking, metabolic disorders, use of antidiabetics, use of                                                                                                                                         |

|                                          |                     |                                                                  |                               |                  |                        |                                                                |      |                  |                                                                                                                                     |
|------------------------------------------|---------------------|------------------------------------------------------------------|-------------------------------|------------------|------------------------|----------------------------------------------------------------|------|------------------|-------------------------------------------------------------------------------------------------------------------------------------|
| Hsiang et al., 2015; China <sup>26</sup> | Cohort              | 38.1                                                             | T:53513<br>M:14145<br>W:39368 | Hospital-based   | Subjects with HBV      | Subjects with no statin prescription                           | 1298 | 4.6 <sup>b</sup> | aspirin, use of paracetamol<br>Age, sex, albumin, ALT, comorbidities, creatinine, medications, platelet count, total bilirubin      |
| Chen et al., 2015; Taiwan <sup>21</sup>  | Nested case-control | 62.6                                                             | T:1700<br>M:1325<br>W:375     | Hospital-based   | Subjects with diabetes | Unclear                                                        | 340  | ≤11.0            | Alcoholic liver damage, HCV, HBV, cirrhosis duration                                                                                |
| Chen et al., 2015; Taiwan <sup>13</sup>  | Cohort              | NA                                                               | T:61898<br>M:35595<br>W:26303 | Population-based | Subjects with HBV      | Subjects using statins <28 cDDD                                | 1735 | ≤9.0             | Age, sex, acetylcholinesterase inhibitors, anti-HBV drugs, area, aspirin, comorbidities, index year, nonstatin lipid-lowering drugs |
| Butt et al., 2015; USA <sup>34</sup>     | Cohort              | 53.0 for statin users;<br>52.0 for statin non-users <sup>b</sup> | T:7248<br>M:6929<br>W:319     | Population-based | Subjects with HCV      | Subjects using statins ≤14 days or with no statin prescription | NA   | ≥2.0             | FIB-4 score                                                                                                                         |

|                                                             |                           |                   |                                  |                   |                    |                                             |       |       |                                                                                                                                     |
|-------------------------------------------------------------|---------------------------|-------------------|----------------------------------|-------------------|--------------------|---------------------------------------------|-------|-------|-------------------------------------------------------------------------------------------------------------------------------------|
| McGlynn et al., 2014; USA <sup>17</sup>                     | Nested case-control       | NA                | T:562<br>M:418<br>W:144          | Population -based | General population | Subjects with no statin prescription        | 94    | 8.1   | Alcohol-related disorders, chronic obstructive pulmonary disease, diabetes, HCV, hypertension, race                                 |
| Tsan et al., 2013; Taiwan <sup>14</sup>                     | Cohort                    | 50.4 <sup>b</sup> | T:260864<br>M:128263<br>W:132601 | Population -based | Subjects with HCV  | Subjects using statins <28 cDDD             | 27883 | 10.7  | Age, sex, diabetes, income, liver cirrhosis, urbanization                                                                           |
| Leung et al., 2013; Taiwan <sup>36</sup>                    | Cohort                    | 58.3              | T:34205<br>M:16150<br>W:18055    | Population -based | General population | Subjects with one or no statin prescription | 424   | 4.2   | Age, sex, cardiovascular drugs, Charlson score, comorbidities, hormone-replacement therapy, non-statin lipid-lowering drugs, NSAIDs |
| King et al., 2013; USA <sup>38</sup>                        | Cohort                    | NA                | T:136178<br>M:39634<br>W:96544   | Population -based | General population | Unclear                                     | 125   | ≤20.0 | Age, alcohol, aspirin, BMI, diabetes, smoking                                                                                       |
| Tsan et al., 2012; Taiwan <sup>15</sup>                     | Cohort                    | 35.6 <sup>b</sup> | T:33413<br>M:19442<br>W:13971    | Population -based | Subjects with HBV  | Subjects using statins <28 cDDD             | 1021  | 9.8   | Age, sex, diabetes, income, liver cirrhosis, urbanization                                                                           |
| Emberson et al., 2012; Europe, Australia, USA <sup>39</sup> | Post hoc analysis of RCTs | 63.0              | T:134537<br>M:95529<br>W:39008   | Hospital-based    | General population | Subjects with no statin prescription        | 68    | 4.8   | None                                                                                                                                |
| Marelli et al., 2012; USA <sup>33</sup>                     | Cohort                    | 64.2              | T:91714<br>M:48059               | Population -based | General population | Subjects with no statin                     | 105   | 4.7   | Age, sex, comorbidities, BMI, race, smoking                                                                                         |



|                                              |                           |      |                                        |                  |                        |                                                                        |      |                  |                                                                                                                          |
|----------------------------------------------|---------------------------|------|----------------------------------------|------------------|------------------------|------------------------------------------------------------------------|------|------------------|--------------------------------------------------------------------------------------------------------------------------|
| Matsushita et al., 2010; Japan <sup>22</sup> | Post hoc analysis of RCTs | 57.6 | W:43655<br>T:13724<br>M:7082<br>W:6642 | Hospital-based   | General population     | prescription<br>Subjects with no statin                                | 12   | 5.1              | Age, sex, smoking                                                                                                        |
| El-Serag et al., 2009; USA <sup>40</sup>     | Nested case-control       | 72.0 | T:6515<br>M:6430<br>W:85               | Hospital-based   | Subjects with diabetes | prescription<br>Subjects with no statin                                | 1303 | 2.4              | ACEIs, alcoholic liver disease, alcoholism, cirrhosis, HBV, HCV, anti-HCV drugs, NSAIDs, propensity to use statins, race |
| Friedman et al., 2008; USA <sup>29</sup>     | Cohort                    | NA   | T:361859<br>M:192598<br>W:169261       | Population-based | General population     | Subjects with no statin                                                | 42   | 4.9 <sup>b</sup> | Calendar year                                                                                                            |
| Sato et al., 2006; Japan <sup>23</sup>       | Post hoc analysis of RCTs | NA   | T:263<br>M:215<br>W:48                 | Hospital-based   | Subjects with CHD      | prescription<br>Subjects using statins for $\leq 25\%$ of study period | 1    | 4.8              | Age, sex, pravastatin medicated, smoking, total serum cholesterol                                                        |
| Friis et al., 2005; Denmark <sup>42</sup>    | Cohort                    | 47.1 | T:348262<br>M:175775<br>W:172487       | Population-based | General population     | Subjects with one or no statin prescription                            | 171  | 3.5              | Age, sex, calendar period, cardiovascular drugs, hormone-replace treatment, NSAIDs                                       |

Abbreviations: ACEIs, angiotensin converting enzyme inhibitor; ALT, alanine aminotransferase; BMI, body mass index; cDDDs, cumulative defined daily doses; CHD, coronary heart disease; HBV, hepatitis B virus; HCV, hepatitis C virus; M: men; NA, not available; NSAIDs, nonsteroidal anti-inflammatory drugs; RCT, randomized controlled trial; T, total; W: women.

<sup>a</sup> Mean value unless otherwise specified.

<sup>b</sup> Median value.

**Supplementary Table S2.** Characteristics of included case-control studies on statin use and primary liver cancer risk

| Study; location                                     | Study period | Age (y) <sup>a</sup> | Sample size                   | Data source      | Study population   | Definition of nonuser                                                 | Cases/ Controls | Adjustment factors                                                                                                                                                                                                                                                                                         |
|-----------------------------------------------------|--------------|----------------------|-------------------------------|------------------|--------------------|-----------------------------------------------------------------------|-----------------|------------------------------------------------------------------------------------------------------------------------------------------------------------------------------------------------------------------------------------------------------------------------------------------------------------|
| Peng et al., 2015; Taiwan <sup>20</sup>             | 2002-2011    | 68.0                 | T:6348<br>M:3241<br>W:3107    | Population-based | General population | Subjects with no statin prescription                                  | 3174/<br>3174   | Age, sex, aspirin, alcohol-related illness, biliary tract disease, coronary artery disease, Charlson comorbidity index score, chronic pancreatitis, cirrhosis, chronic obstructive pulmonary disease, diabetes, gastric disease, haemochromatosis, HBV, HCV, inflammatory bowel disease, stroke, metformin |
| Björkhem-Bergman et al., 2014; Sweden <sup>37</sup> | 2006-2010    | NA                   | T:23964<br>M:12456<br>W:11508 | Population-based | General population | Subjects using statins $\leq 9$ months or with no statin prescription | 3994/<br>19970  | Age, sex, acetylsalicylic acid, alcohol hepatitis, chemotherapy, diabetes, education, liver disease, NSAIDs, treatment with cortisone, viral hepatitis                                                                                                                                                     |
| Lai et al., 2013; Taiwan <sup>18</sup>              | 2000-2009    | 62.6                 | T:17400<br>M:12625<br>W:4775  | Population-based | General population | Subjects with no statin prescription                                  | 3480/<br>13920  | Age, sex, alcoholic liver damage, cirrhosis, diabetes, duration of statin use, HBV, HCV, non-alcoholic fatty liver disease, non-statin lipid-lowering drug, drugs for HBV and HCV, use of metformin, use of thiazolidinedione                                                                              |

---

|                                                 |           |      |                                 |                      |                       |                                         |                |                                                                                                                                                                     |
|-------------------------------------------------|-----------|------|---------------------------------|----------------------|-----------------------|-----------------------------------------|----------------|---------------------------------------------------------------------------------------------------------------------------------------------------------------------|
| Chaiteerakij et al.,<br>2013; USA <sup>32</sup> | 2000-2010 | 61.4 | T:421<br>M:208<br>W:213         | Hospital-<br>based   | General<br>population | Subjects with no<br>statin prescription | 165/<br>256    | None                                                                                                                                                                |
| Chiu et al., 2011;<br>Taiwan <sup>19</sup>      | 2005-2008 | 66.0 | T:2332<br>M:1606<br>W:726       | Population-<br>based | General<br>population | Subjects with no<br>statin prescription | 1166/<br>1166  | Sex, alcoholic liver disease, birth<br>year, cirrhosis, diabetes, HBV,<br>HCV, index date, number of<br>hospitalizations, use of non-statin<br>lipid-lowering drugs |
| Khurana et al.,<br>2005;USA <sup>41</sup>       | 1998-2004 | 61.1 | T:480306<br>M:440441<br>W:39865 | Population-<br>based | Subjects<br>with HCV  | NA                                      | 409/<br>479897 | Age, HCV                                                                                                                                                            |

---

Abbreviations: cDDD, cumulative defined daily doses; HBV, hepatitis B virus; HCV, hepatitis C virus; M: men; NA, not available; NSAIDs, nonsteroidal anti-inflammatory drugs; T, total; W: women.

<sup>a</sup> Mean value.

**Supplementary Table S3.** The Results of quality assessment for cohort studies and post hoc analyses of RCTs

| Study                                | Selection                                 |                                      |                             | Comparability              |                                 | Outcome                 |                                | Total Score |                                    |
|--------------------------------------|-------------------------------------------|--------------------------------------|-----------------------------|----------------------------|---------------------------------|-------------------------|--------------------------------|-------------|------------------------------------|
|                                      | Representativeness of exposed cohort<br>☆ | Selection of non-exposed cohort<br>☆ | Exposure ascertainment<br>☆ | No history of disease<br>☆ | Comparable on confounders<br>☆☆ | Outcome Assessment<br>☆ | Adequate follow-up (≥10y)<br>☆ |             | Loss to follow-up rate (≤20%)<br>☆ |
| Simon et al. 2016 <sup>16</sup>      | ☆                                         | ☆                                    | ☆                           | ☆                          | ☆                               | ☆                       | ☆                              | ☆           | 8                                  |
| Tsan et al. 2015 <sup>35</sup>       | ☆                                         | ☆                                    |                             | ☆                          | ☆                               |                         |                                | ☆           | 5                                  |
| Hsiang et al. 2015 <sup>26</sup>     | ☆                                         | ☆                                    | ☆                           | ☆                          | ☆                               | ☆                       |                                | ☆           | 7                                  |
| Chen et al. 2015 <sup>13</sup>       | ☆                                         | ☆                                    | ☆                           | ☆                          | ☆                               | ☆                       |                                | ☆           | 7                                  |
| Butt et al. 2015 <sup>34</sup>       | ☆                                         | ☆                                    | ☆                           | ☆                          | ☆                               |                         | ☆                              | ☆           | 7                                  |
| Tsan et al. 2013 <sup>14</sup>       | ☆                                         | ☆                                    | ☆                           | ☆                          | ☆                               |                         | ☆                              | ☆           | 8                                  |
| Leung et al. 2013 <sup>36</sup>      | ☆                                         | ☆                                    | ☆                           | ☆                          | ☆                               |                         |                                | ☆           | 6                                  |
| King et al. 2013 <sup>38</sup>       | ☆                                         | ☆                                    |                             | ☆                          | ☆                               |                         | ☆                              | ☆           | 7                                  |
| Tsan et al. 2012 <sup>15</sup>       | ☆                                         | ☆                                    | ☆                           | ☆                          | ☆                               |                         | ☆                              | ☆           | 7                                  |
| Emberson et al. 2012 <sup>39</sup>   | ☆                                         | ☆                                    |                             | ☆                          | ☆                               | ☆                       | ☆                              | ☆           | 7                                  |
| Marelli et al. 2011 <sup>33</sup>    | ☆                                         | ☆                                    | ☆                           | ☆                          | ☆                               |                         | ☆                              | ☆           | 7                                  |
| Matsushita et al. 2010 <sup>22</sup> | ☆                                         | ☆                                    |                             | ☆                          | ☆                               | ☆                       | ☆                              | ☆           | 7                                  |
| Friedman et al. 2008 <sup>29</sup>   | ☆                                         | ☆                                    | ☆                           | ☆                          | ☆                               |                         | ☆                              | ☆           | 7                                  |
| Sato et al. 2006 <sup>23</sup>       |                                           | ☆                                    | ☆                           | ☆                          | ☆                               |                         | ☆                              | ☆           | 6                                  |
| Friis et al. 2005 <sup>42</sup>      | ☆                                         | ☆                                    | ☆                           | ☆                          | ☆                               |                         | ☆                              | ☆           | 7                                  |

Abbreviations: RCTs, randomized controlled trials.

**Supplementary Table S4.** The Results of quality assessment for nested case-control studies and case-control study

| Study                                      | Selection                |                             |                       | Comparability          |                           | Outcome                |                                      |                   | Total Score |
|--------------------------------------------|--------------------------|-----------------------------|-----------------------|------------------------|---------------------------|------------------------|--------------------------------------|-------------------|-------------|
|                                            | Adequate case definition | Representativeness of cases | Selection of controls | Definition of controls | Comparable on confounders | Exposure ascertainment | Ascertainment for cases and controls | Non-response rate |             |
| Peng et al. 2015 <sup>20</sup>             | ☆                        | ☆                           | ☆                     | ☆                      | ☆☆                        | ☆                      | ☆                                    | ☆                 | 6           |
| McGlynn et al. 2015 <sup>12</sup>          | ☆                        | ☆                           | ☆                     | ☆                      | ☆☆                        | ☆                      | ☆                                    | ☆                 | 8           |
| Chen et al. 2015 <sup>21</sup>             |                          | ☆                           | ☆                     | ☆                      | ☆☆                        | ☆                      | ☆                                    | ☆                 | 6           |
| McGlynn et al. 2014 <sup>17</sup>          | ☆                        | ☆                           | ☆                     | ☆                      | ☆☆                        | ☆                      | ☆                                    | ☆                 | 7           |
| Björkhem-Bergman et al. 2014 <sup>37</sup> | ☆                        | ☆                           | ☆                     | ☆                      | ☆☆                        | ☆                      | ☆                                    | ☆                 | 8           |
| Lai et al. 2013 <sup>18</sup>              | ☆                        | ☆                           | ☆                     | ☆                      | ☆☆                        |                        | ☆                                    | ☆                 | 7           |
| Chaiteerakij et al. 2013 <sup>32</sup>     | ☆                        | ☆                           | ☆                     | ☆                      | ☆☆                        | ☆                      | ☆                                    | ☆                 | 6           |
| Chiu et al. 2011 <sup>19</sup>             | ☆                        | ☆                           | ☆                     | ☆                      | ☆☆                        | ☆                      | ☆                                    | ☆                 | 7           |
| El-Serag et al. 2009 <sup>40</sup>         | ☆                        | ☆                           | ☆                     | ☆                      | ☆☆                        | ☆                      | ☆                                    | ☆                 | 8           |
| Khurana et al. 2005 <sup>41</sup>          |                          | ☆                           | ☆                     | ☆                      | ☆☆                        |                        | ☆                                    | ☆                 | 5           |

**Supplementary Table S5.** Individual statin use and primary liver cancer risk

| Type of statins | No. of studies | Cancer cases | Sample size | Random-effects model |            | Fixed-effects model |            | Tests for heterogeneity |                           |
|-----------------|----------------|--------------|-------------|----------------------|------------|---------------------|------------|-------------------------|---------------------------|
|                 |                |              |             | RR                   | 95% CI     | RR                  | 95% CI     | <i>P</i>                | <i>I</i> <sup>2</sup> (%) |
| Pravastatin     | 8              | 248          | 15172       | 0.71                 | 0.58, 0.88 | 0.70                | 0.59, 0.83 | 0.29                    | 17.5                      |
| Simvastatin     | 7              | 1945         | 10060       | 0.61                 | 0.54, 0.69 | 0.62                | 0.57, 0.69 | 0.22                    | 27.2                      |
| Atorvastatin    | 6              | 650          | 4855        | 0.53                 | 0.42, 0.67 | 0.61                | 0.55, 0.68 | <0.01                   | 70.7                      |
| Fluvastatin     | 6              | 245          | 1506        | 0.65                 | 0.52, 0.81 | 0.69                | 0.58, 0.81 | 0.25                    | 24.3                      |
| Rosuvastatin    | 6              | 202          | 1195        | 0.49                 | 0.34, 0.69 | 0.58                | 0.48, 0.70 | 0.10                    | 45.8                      |
| Lovastatin      | 5              | 386          | 2111        | 0.65                 | 0.56, 0.74 | 0.65                | 0.56, 0.74 | 0.67                    | 0.0                       |

Abbreviations: CI, confidence interval; RR, risk ratio.

**Supplementary Table S6.** Subgroup analyses of statin use and primary liver cancer risk based on the overall meta-analysis

| Subgroup                          | Number of studies | RR   | 95% CI     | $I^2$ (%) | $P_{\text{heterogeneity}}$ | $P_{\text{interaction}}^{\text{a}}$ |
|-----------------------------------|-------------------|------|------------|-----------|----------------------------|-------------------------------------|
| All studies                       | 24                | 0.60 | 0.53, 0.69 | 85.0      | <0.01                      | -                                   |
| Study design                      |                   |      |            |           |                            |                                     |
| Cohort study                      | 11                | 0.53 | 0.46, 0.62 | 66.6      | <0.01                      | 0.10                                |
| Case-control study                | 6                 | 0.71 | 0.60, 0.83 | 77.6      | <0.01                      |                                     |
| Nested case-control study         | 4                 | 0.56 | 0.42, 0.75 | 71.0      | 0.02                       |                                     |
| Post hoc analysis of RCTs         | 3                 | 0.96 | 0.62, 1.49 | 0.0       | 0.62                       |                                     |
| Source of subjects                |                   |      |            |           |                            |                                     |
| Population-based                  | 17                | 0.58 | 0.50, 0.68 | 88.9      | <0.01                      | 0.29                                |
| Hospital-based                    | 7                 | 0.70 | 0.60, 0.82 | 11.0      | 0.35                       |                                     |
| Sex                               |                   |      |            |           |                            |                                     |
| Man                               | 6                 | 0.52 | 0.40, 0.69 | 77.5      | <0.01                      | 0.55                                |
| Women                             | 6                 | 0.47 | 0.36, 0.60 | 36.0      | 0.17                       |                                     |
| Individual age                    |                   |      |            |           |                            |                                     |
| ≥50y                              | 4                 | 0.45 | 0.31, 0.65 | 76.0      | <0.01                      | 0.40                                |
| < 50y                             | 4                 | 0.53 | 0.42, 0.67 | 0.0       | 0.73                       |                                     |
| Sample size                       |                   |      |            |           |                            |                                     |
| ≥10,000                           | 15                | 0.61 | 0.50, 0.73 | 89.2      | <0.01                      | 0.97                                |
| <10,000                           | 9                 | 0.62 | 0.53, 0.73 | 61.4      | <0.01                      |                                     |
| Study location                    |                   |      |            |           |                            |                                     |
| Asian                             | 12                | 0.56 | 0.47, 0.67 | 83.2      | <0.01                      | 0.26                                |
| Western                           | 12                | 0.65 | 0.54, 0.77 | 79.2      | <0.01                      |                                     |
| High-risk population <sup>b</sup> |                   |      |            |           |                            |                                     |

|                            |    |      |            |      |       |      |
|----------------------------|----|------|------------|------|-------|------|
| Yes                        | 7  | 0.51 | 0.43, 0.59 | 67.4 | <0.01 | 0.02 |
| No                         | 17 | 0.67 | 0.59, 0.76 | 69.3 | <0.01 |      |
| Study quality              |    |      |            |      |       |      |
| High                       | 17 | 0.61 | 0.52, 0.72 | 88.0 | <0.01 | 0.78 |
| Low                        | 7  | 0.59 | 0.47, 0.73 | 66.8 | <0.01 |      |
| Adjustment for diabetes    |    |      |            |      |       |      |
| Yes                        | 12 | 0.63 | 0.53, 0.74 | 88.7 | <0.01 | 0.43 |
| No                         | 12 | 0.57 | 0.46, 0.71 | 75.2 | <0.01 |      |
| Adjustment for HCV         |    |      |            |      |       |      |
| Yes                        | 9  | 0.66 | 0.57, 0.77 | 80.6 | <0.01 | 0.24 |
| No                         | 15 | 0.56 | 0.48, 0.65 | 63.9 | <0.01 |      |
| Adjustment for HBV         |    |      |            |      |       |      |
| Yes                        | 8  | 0.63 | 0.51, 0.77 | 91.0 | <0.01 | 0.49 |
| No                         | 16 | 0.57 | 0.51, 0.64 | 38.0 | 0.06  |      |
| Adjustment for confounders |    |      |            |      |       |      |
| Unadjusted                 | 2  | 0.79 | 0.45, 1.37 | 68.6 | 0.07  | 0.45 |
| 1-3 confounders            | 5  | 0.53 | 0.46, 0.62 | 0.0  | 0.78  |      |
| 4-6 confounders            | 8  | 0.55 | 0.46, 0.67 | 44.1 | 0.08  |      |
| ≥7 confounders             | 9  | 0.63 | 0.52, 0.77 | 89.9 | <0.01 |      |

Abbreviations: CI, confidence interval; HBV, hepatitis B virus; HCV, hepatitis C virus; RCTs, randomized controlled trials; RR, risk ratio.

<sup>a</sup> $P_{\text{interaction}}$  between subgroups was calculated with meta-regression.

<sup>b</sup> “High-risk population” refers to subjects with HBV or HCV infection.



**Supplementary Table S7.** Sensitivity analyses of statin use and primary liver cancer risk

| Category                                                             | n  | RR   | 95% CI     | $I^2$ (%) |
|----------------------------------------------------------------------|----|------|------------|-----------|
| Statistical model                                                    |    |      |            |           |
| Random-effects model                                                 | 24 | 0.60 | 0.53, 0.69 | 85.0      |
| Fixed-effects model                                                  | 24 | 0.65 | 0.63, 0.68 | 85.0      |
| Analysis using unadjusted risk estimates                             | 22 | 0.61 | 0.52, 0.72 | 90.3      |
| Analysis within                                                      |    |      |            |           |
| Observational studies                                                | 21 | 0.57 | 0.49, 0.67 | 86.5      |
| Studies where non-users refer to persons with no statin prescription | 13 | 0.68 | 0.60, 0.76 | 50.1      |
| Analysis without                                                     |    |      |            |           |
| Studies with sample size >100,000                                    | 18 | 0.60 | 0.52, 0.70 | 83.6      |
| Studies with sample size <1,000                                      | 21 | 0.61 | 0.53, 0.70 | 86.6      |

Abbreviations: CI, confidence interval; RR, risk ratio.

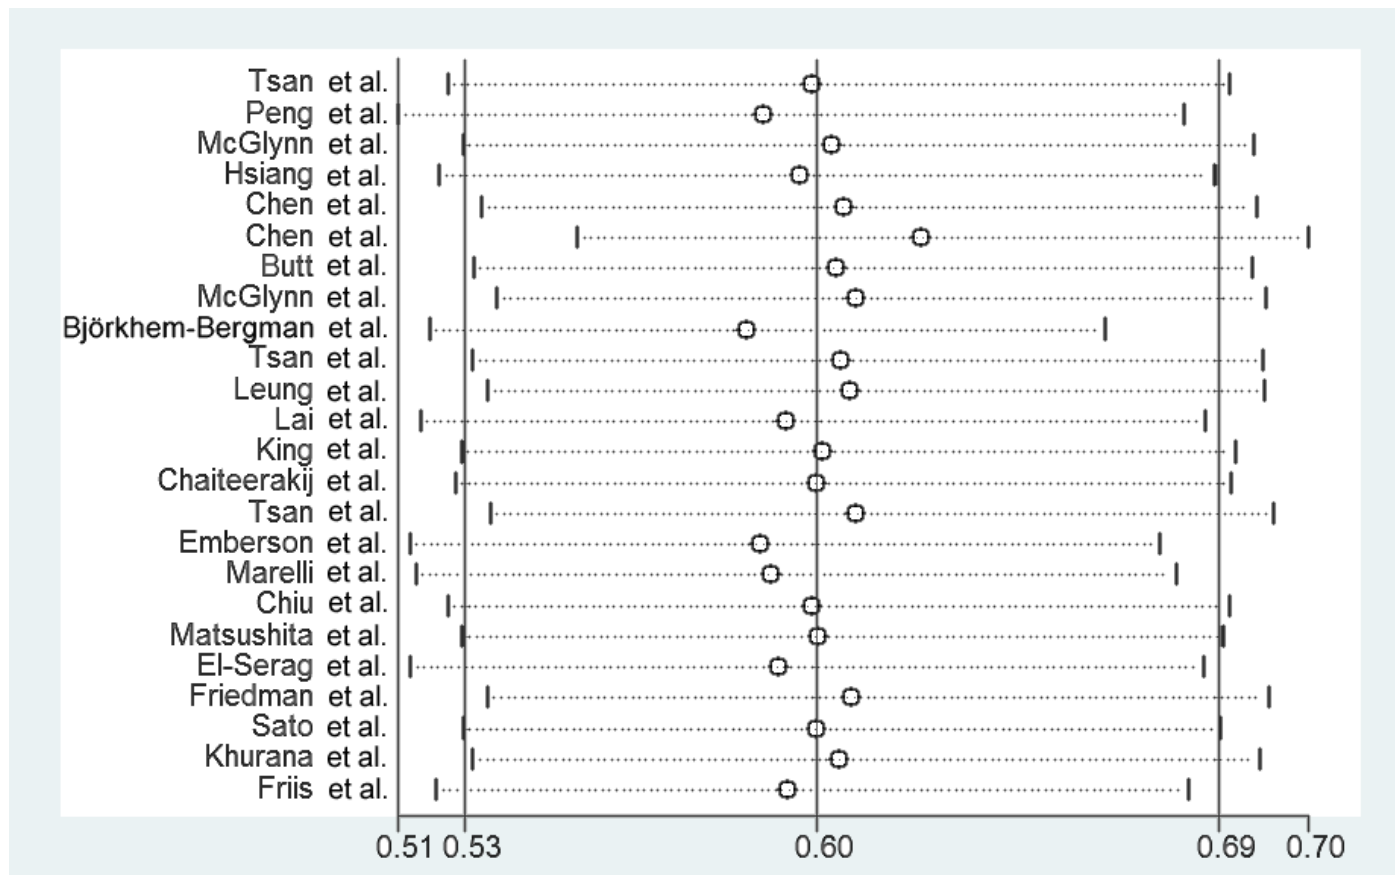

**Supplementary Fig. 1** Sensitivity analysis on parity and primary liver cancer risk: exclusion of a single study in turn. The study cited on the left is the one left out in each turn. The circle represents the summary risk estimates after exclusion of a single study, and the corresponding dot line represents 95% confidence interval. The middle vertical solid line represents summary risk estimates of all included studies, and left and right vertical solid line represent lower limit and upper limit, respectively.
